# GATA2 functions at multiple steps in hemangioblast development and differentiation

Jesse J. Lugus<sup>1,2</sup>, Yun Shin Chung<sup>1</sup>, Jason C. Mills<sup>1</sup>, Shin-Il Kim<sup>3</sup>, Jeffery A. Grass<sup>3</sup>, Michael Kyba<sup>4</sup>, Jason M. Doherty<sup>1</sup>, Emery H. Bresnick<sup>3</sup> and Kyunghee Choi<sup>1,2,\*</sup>

Molecular mechanisms that regulate the generation of hematopoietic and endothelial cells from mesoderm are poorly understood. To define the underlying mechanisms, we compared gene expression profiles between embryonic stem (ES) cell-derived hemangioblasts (Blast-Colony-Forming Cells, BL-CFCs) and their differentiated progeny, Blast cells. Bioinformatic analysis indicated that BL-CFCs resembled other stem cell populations. A role for *Gata2*, one of the BL-CFC-enriched transcripts, was further characterized by utilizing the in vitro model of ES cell differentiation. Our studies revealed that *Gata2* was a direct target of BMP4 and that enforced GATA2 expression upregulated *Bmp4*, *Flk1* and *Scl*. Conditional GATA2 induction resulted in a temporal-sensitive increase in hemangioblast generation, precocious commitment to erythroid fate, and increased endothelial cell generation. GATA2 additionally conferred a proliferative signal to primitive erythroid progenitors. Collectively, we provide compelling evidence that GATA2 plays specific, contextual roles in the generation of Flk-1<sup>+</sup> mesoderm, the Flk-1<sup>+</sup>Scl<sup>+</sup> hemangioblast, primitive erythroid and endothelial cells.

**KEY WORDS:** Embryonic stem, Hemangioblast, BMP4, GATA2, *Flk1* (*Kdr1*), *Scl*, Cell cycle

## INTRODUCTION

The evidence for the hemangioblast, the common progenitor of endothelial and hematopoietic cells, has been elusive until recently. Studies utilizing the in vitro differentiation model of ES cells have demonstrated that a subset of individual Flk-1<sup>+</sup> (Kdr – Mouse Genome Informatics) cells isolated from differentiating ES cells can produce both hematopoietic and endothelial cells in culture, providing a compelling case for the hemangioblast (Choi et al., 1998; Nishikawa et al., 1998). In further determining molecular markers of the hemangioblast, we recently showed that Flk-1<sup>+</sup>Scl<sup>+</sup> (Scl: Tal1 – Mouse Genome Informatics) cells derived from differentiating ES cells are enriched for the hemangioblast (Faloon et al., 2000; Chung et al., 2002). In the developing embryo, brachyury<sup>+</sup>Flk-1<sup>+</sup> cells readily displayed hemangioblast activity as defined by their in vitro potential to form Blast colonies (Huber et al., 2004). High hemangioblast activity was detected in the posterior primitive streak, whereas distal primitive streak, the anterior region, the lateral domains, and the yolk sac had little hemangioblast activity. These studies suggest that the hemangioblast in the developing embryo arises within the primitive streak and rapidly differentiates into its progeny, hematopoietic and endothelial precursors. Thus, the bi-potentiality of the hemangioblast to generate blood and endothelial cells appears to be rapidly lost once the hemangioblast is formed, implicating a transient nature for the hemangioblast. Consistent with this notion, the bipotentiality of the EB (embryoid body, in vitro differentiated ES cells)-derived BL-CFC is highest when analyzed from the earliest stages of BL-CFC formation (Choi et al., 1998).

The mechanisms that regulate the development and differentiation of the hemangioblast are poorly understood. BMP signaling is crucial for hematopoietic and vascular development (Larsson and Karlsson, 2005; Miyazono et al., 2005; Moser and Patterson, 2005). Recently, we demonstrated that BMP4 was sufficient to generate Flk-1<sup>+</sup> mesoderm (Park et al., 2004). Specifically, BMP4 was able to induce Flk-1<sup>+</sup> cells from the brachyury<sup>+</sup> stage of EB cells in serum free conditions, suggesting that BMP4 specifies differentiation of Flk-1<sup>+</sup> mesoderm from brachyury<sup>+</sup> mesoderm. The downstream effectors that mediate BMP signaling are unknown. However, BMP4 signaling has been implicated in activating expression of *Gata2*, an important regulator of multipotent hematopoietic precursor cells. Utilizing *Xenopus* animal cap assays, Maeno et al. (Maeno et al., 1996) showed that injection of *bmp4* mRNA directly into animal caps activated *Gata2* gene transcription. Furthermore, Friedle and Knochel (Friedle and Knochel, 2002) showed that the transcriptional activation of *Gata2* was translation independent, as cycloheximide did not block *Gata2* transcription. The identification of a Bmp4 response element (BRE) in the 5' promoter region of zebrafish *gata2* that binds Smad1 and Oct-1 provides further evidence for BMP4 mediated activation of *gata2* (Oren et al., 2005).

In the current report, we undertook a global gene expression profiling approach to identify BMP4 targets during hematopoietic and vascular development. We compared gene expression profiles between Flk-1<sup>+</sup>Scl<sup>+</sup> cells, a subset of Flk-1<sup>+</sup> mesoderm that contains the putative hemangioblast cell population, and their differentiated progeny, Blast cells (Choi et al., 1998). Based on bioinformatic analysis of patterns of gene expression, the BL-CFCs resembled other multipotential stem cell populations. At the individual gene level, we noted that *Gata2* was enriched in BL-CFCs. Our present studies indicate that *Gata2* is rapidly induced by BMP4 and that enforced GATA2 upregulates *Bmp4* expression. Enforced *Gata2* expression also induced Flk-1<sup>+</sup> and Scl<sup>+</sup> cells in the absence of any added factors. GATA2 occupied regulatory elements at the *Bmp4* and *Scl* loci in differentiating EBs. Importantly, the increase in Flk-1<sup>+</sup> and Scl<sup>+</sup> cell generation resulted in an expansion of Blast as well as primitive erythroid and endothelial cell progenitors. Systematic

<sup>1</sup>Department of Pathology and Immunology and <sup>2</sup>Molecular Cell Biology Program, Washington University School of Medicine, St Louis, MO 63110, USA. <sup>3</sup>Department of Pharmacology, University of Wisconsin Medical School, Madison, WI, USA. <sup>4</sup>Center for Developmental Biology, University of Texas Southwestern Medical Center, Dallas, TX, USA.

\* Author for correspondence (e-mail: kchoi@wustl.edu)

modulation of *Gata2* provided strong evidence for the transient nature of the hemangioblast. Additionally, enforced *Gata2* expression in the primitive erythroid progenitor revealed its essential role in promoting cell cycle progression. Collectively, we provide compelling evidence for GATA2 function in hemangioblast generation and differentiation.

## MATERIALS AND METHODS

### Cell culture

R1, A2Lox, iGATA2, J1 and *Gata2*<sup>-/-</sup> ES cells were maintained on PMEF cells (Specialty Media-Chemicon, NJ) in DMEM with 15% pre-selected fetal calf serum (FCS), 2% LIF, 1% L-glutamine, 1% NEAA and  $4.5 \times 10^{-4}$  M MTG. Differentiation of ES cells to EBs has been previously described (Park et al., 2004). Briefly, cells were differentiated in IMDM containing 15% differentiation-screened FCS, 1% L-glutamine, 50  $\mu$ g/ml ascorbic acid and  $4.5 \times 10^{-4}$  M MTG. Serum-free conditions substituted KNOCKOUT SR (Gibco BRL) for FCS and contained 5% PFHM II (Gibco BRL). GATA2 was induced in iGATA2 cells with 0.3  $\mu$ g/ml doxycycline (Dox). BMP4 (R&D Systems) was added at 5 ng/ml. Noggin (R&D Systems) was used at

10 ng/ml. Blast colonies were generated by harvesting cells at the indicated day, dissociating in trypsin, passing through a 20G needle four to six times and plating in the presence of VEGF (5 ng/ml), kit ligand (1% conditioned media) and D4T endothelial cell conditioned media (25%) and with or without Dox for iGATA2 cells. Erythroid cells were generated in methylcellulose in the presence of 10% plasma-derived serum (PDS, Antech, TX), 5% PFHM II, ascorbic acid (12.5  $\mu$ g/ml), L-glutamine (2 mM), transferrin (300  $\mu$ g/ml, Boehringer Mannheim) and 2 units/ml EPO (Amgen, Thousand Oaks, CA)

### GeneChip analysis

GeneChip results were analyzed in dChip (Li and Wong, 2001; Zhong et al., 2003). Median chip intensity and percent present call were similar across all chips and were within normal ranges; gene expression differences were determined using a 90% confidence interval of  $>1.2$ -fold and above, and a baseline to experimental intensity difference of  $>50$ . Genes enriched in each cell population (Blast or BL-CFC) were functionally categorized using GOurlmet to determine distribution of the Gene Ontology (GO) (<http://www.geneontology.org/>) terms associated with each gene in the list (Doherty et al., 2006). For Fig. 1A, all genes in either the BL-CFC- or Blast-

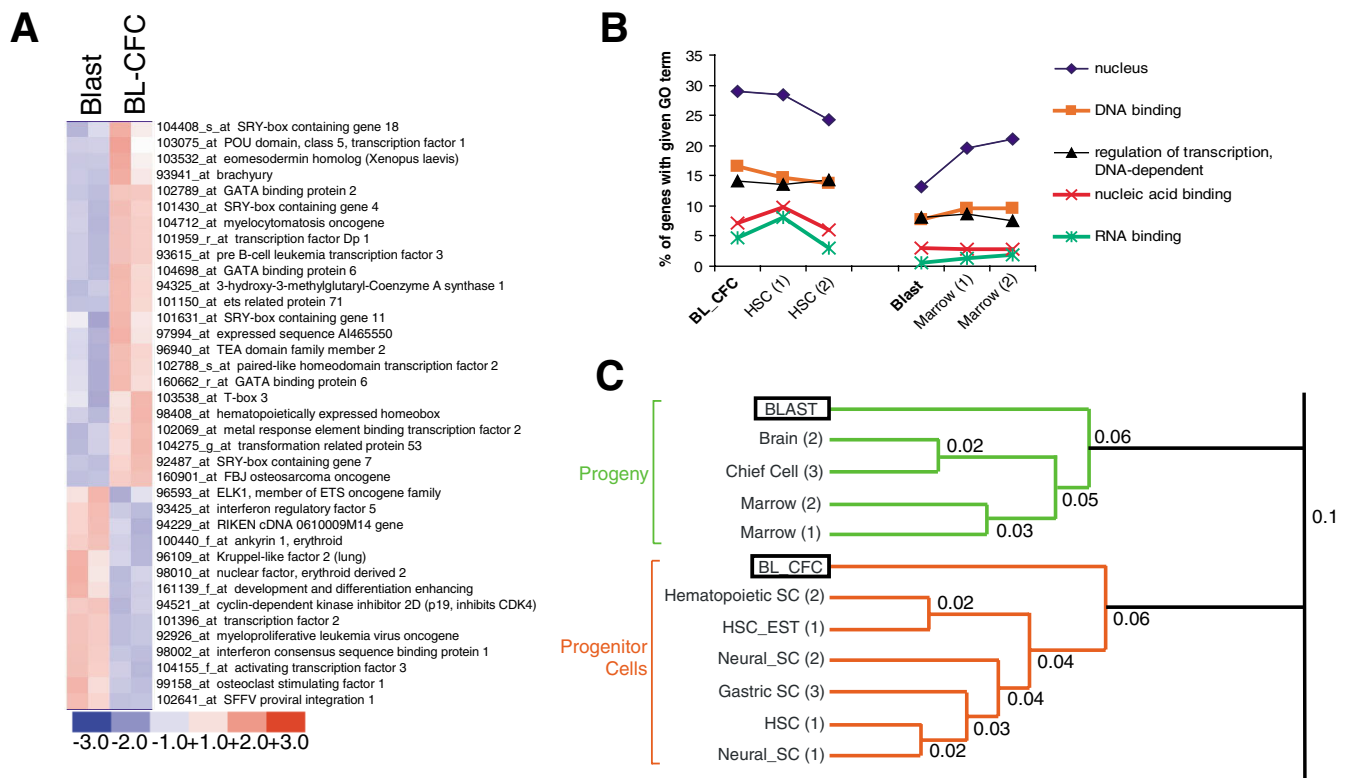

**Fig. 1. Molecular profile of the hemangioblast and relationship to other stem cells. (A)** The 37 genes representing the GO term 'regulation of transcription, DNA-dependent' were extracted from the list of 667 genes that were differentially expressed between BL-CFC and Blast and used to cluster the duplicate Blast and BL-CFC chips. The scale for relative enrichment of each transcript is depicted at the bottom: 3-fold or greater enrichment for a transcript on one chip relative to the other chips is depicted in dark red, whereas 3-fold less expression of that transcript is in dark blue. **(B)** The five GO terms with the highest relative representation in the BL-CFC profile are graphed with respect to their fractional representation among the genes of hematopoietic stem cells and their progeny, mature bone marrow cells, and also relative to the Blast profile. The most-represented GO terms in the progenitor populations relate to nuclear functions, including synthesis of and binding to nucleic acids. **(C)** Expression profiles (i.e. lists of genes enriched in a given cell population) from three previous analyses of progenitor and progeny gene expression were used to analyze the progenitor-progeny relationship between BL-CFC and Blast cells. Expression profiles were clustered based on differences between the overall representation of GO terms within each profile. Differences between each profile are represented by Pearson correlation, where 0.0 indicates identical GO term distribution between two profiles, 1.0 indicates no correlation, and 2.0 indicates negative correlation. Cell profiles are as follows: HSC (1), Marrow (1), Neural\_SC (1), and HSC\_EST(1) indicate Hematopoietic Stem Cell, Bone Marrow Cell, Neural Stem Cell, and Expressed Sequence Tag in Hematopoietic Stem Cells respectively, from Ivanova et al. (Ivanova et al., 2002) and HSC\_EST from Phillips et al. (Phillips et al., 2000). HSC (2), Marrow (2), Neural\_SC (2), and Brain (2) indicate Hematopoietic Stem Cell, Bone Marrow Cell, Neural Stem Cell, and Brain, respectively, from Ramalho-Santos et al. (Ramalho-Santos et al., 2002). Gastric SC (3) and Chief Cell (3) indicate Gastric Stem Cell and Chief Cells, respectively, from Mills et al. (Mills et al., 2002; Mills et al., 2003).

enriched lists that fell under the GO term 'regulation of transcription, DNA-dependent' were determined and a heat map of these genes was prepared using the Hierarchical Clustering feature of dChip. All GeneChip data will be uploaded to Gene Expression Omnibus (GEO) for archiving and sharing purposes.

GOurlmet (Doherty et al., 2006) was also used to determine the distribution of all GO terms in a series of previously published expression profiles of stem cell populations with their paired differentiated progeny. In all cases, the lists of stem cell-enriched genes were determined by acquiring the original .DAT or .CEL chip files and simultaneously comparing replicate progenitor chips to replicate progeny chips using the same threshold criteria as for BL-CFC and Blast. GO distributions were determined for each cell population, and the lists were thereby hierarchically clustered (Fig. 1C). For further details of this approach see Mills et al. (Mills et al., 2002) and Doherty et al. (Doherty et al., 2006).

### Gene expression analysis

RNA was purified using TRIzol (Invitrogen, CA), following the manufacturer's protocol. Total RNA (1 µg) was treated with DNase I and then annealed to 50 ng of random primers at 65°C. Reverse transcription was carried out with RNase H<sup>-</sup> Superscript II reverse transcriptase, 10 mM DTT, RNaseOUT (all from Invitrogen), and 1 mM dNTPs at 42°C for 1 hour. Reactions were diluted with DEPC-TE to 95 µl followed by heat inactivation at 65°C for 15 minutes. Quantitative PCR (qPCR) reactions (15 µl) contained 1 µl cDNA, 7.5 µl of iQ SYBR Green Supermix (BioRad), 0.15 µl uracil DNA glycosylase (Invitrogen) and 200 nM each forward and reverse primers. Primer sequences are given in Table 1. The effect of BMP4 addition on *Gata2* expression was tested by growing R1 ES cells for 2 days in serum-free media (formulation as above). EBs were harvested on day 2. Cells were collected, washed once with 10 ml IMDM, resuspended in 1 ml IMDM, and incubated on ice for 20 minutes. Recombinant BMP4 (50 ng; R&D Systems) was added along with either 10 µg/ml cycloheximide or DMSO as a vehicle control and cells were incubated for 5 minutes on ice before being transferred to 37°C

for the appropriate time period. After qRT-PCR, the expression level of *Gata2* in untreated EBs was normalized as 1, after being normalized against *Gapdh* values.

### Chromatin immunoprecipitation

Chromatin immunoprecipitation (ChIP) assays were performed as previously described (Im et al., 2004). Day 4, 5 or 6 A2Lox EBs were harvested and crosslinked with 1% formaldehyde at room temperature for 10 minutes. Cells were lysed and chromatin slurry was incubated with Rabbit IgGs (PI) (Santa Cruz), GATA1, or GATA2 antibodies (Im et al., 2005). Genomic material was recovered for assessment by qPCR using the primers listed in Table 1.

### Flow cytometry

For all FACS analyses, EBs were dissociated in 7.5 mM EDTA in PBS for 1.5 minutes at 37°C. Cells were then dissociated by passing through a 20G needle 5-7 times prior to being resuspended in washing/staining buffer (4% FCS in PBS) and counted. Cells were resuspended at  $5 \times 10^6$  cells/ml and plated into individual v-shaped wells of a 96-well plate at  $5 \times 10^5$  cells per well. Cells were incubated with primary antibodies for 15 minutes on ice, washed three times and then incubated on ice in the dark with secondary antibodies for 15 minutes. Cells were washed three times and analyzed using a Becton Dickinson FACS Caliber. For cell-sorting experiments, a MoFlo high speed flow cytometer (Dako, Fort Collins, CO) was used. The primary antibody was a biotinylated anti-human CD4 (Caltag, 1:500). Secondary antibodies include streptavidin-allophycocyanin (SP-APC, Pharmingen, 1:1000), anti-Flk-1-phycoerythrin (Flk-1-PE, Pharmingen, 1:200), anti-CD31-PE (CD31-PE, Pharmingen, 1:200), anti-VE-Cadherin (Pharmingen, 1:200) and anti-Tie2-PE (Tie2-PE, Pharmingen, 1:200).

### Biochemical analysis of iGATA2 cells

To examine the induction of GATA2 protein in iGATA2 cells, cells were differentiated in serum and the indicated amount of Dox was added at D2 of EB formation and cells were collected at D4 of EB formation.

**Table 1. Primers used for qRT-PCR and quantitative ChIP studies**

| Primer pair             | 5' Sequence               | 3' Sequence              |
|-------------------------|---------------------------|--------------------------|
| <i>Gapdh</i>            | TGGCAAAGTGAGATTGTTGCC     | AAGATGGTGATGGGCTCCCG     |
| <i>Flk1</i>             | CTGAATGGACCATGTTTTTC      | CTGTTTGACCAGGCAATGTC     |
| <i>Rex1</i>             | AAGTGAGATTAGCCCCGAGA      | AAAGGTTTTGCTCCACTTCC     |
| <i>Scl</i>              | CAGCCTGATGCTAAGGCAAG      | AGCCAACCTACCATGACAC      |
| <i>Gata1</i>            | ATGGAATCCAGACGAGGAAC      | CTCCCCACAATCCCACTAC      |
| <i>Gata2</i>            | GCAGAGAAGCAAGGCTCGC       | CAGTTGACACACTCCCGGC      |
| <i>Hand2</i>            | TACATCGCCTACCTCATGGA      | GTTGCTCACTGTGCTTT        |
| <i>Nkx2.5</i>           | AGCCTACGGTGACCCTGA        | ATCCGTCCTCGGCTTTGTC      |
| <i>Hnf3β</i>            | ACATACCGACGCACTACAC       | CCGGTAGAAAAGGGAAGAGGT    |
| <i>Hnf4</i>             | AACCACGCTACTTGCCTTTG      | ATGTTTGCACAACCACAGGA     |
| <i>NeuroD</i>           | GCTCCAGGGTTATGAGATCG      | TCCTGAGAAGTACACTCATC     |
| <i>Fgf5</i>             | GGCAGCCTGTACTGCAGAG       | TCCTACAATCCCCTGAGACAC    |
| <i>Gata4</i>            | CGAGGGTGAGCCTGTATGTA      | ACCTGCTGGCGTCTTAGATT     |
| <i>Ttr</i>              | TTTACAGCCAACGACTCTG       | TCTCTCAATTCTGGGGTTG      |
| <i>Bmp4</i>             | GGAGGAGGAAGAGCAGAGC       | TGAAGAGGAAACGAAAAGCA     |
| <i>Vegf</i>             | CATAGAGAGAATGAGCTTCTACAGC | TGCTTTCTCCGCTCTGAACAAGG  |
| <i>Pdgfrα</i>           | AGAAACGATCGTGGTGACCT      | TTTGATGGATGGGAGTTTGA     |
| <i>Kit</i>              | ACAGGCCCTCGGCTAACAAA      | AAGCACTGGCATCAGAGTTG     |
| <i>Rb</i>               | TGACCTGGTAATCTCATTTCAGC   | GGGTGTTGAGGTGAACCAT      |
| <i>Ccnd2</i>            | TGTGGATTGTCTCAAAGCCTG     | CAACATCCCGCAGCTCTGTA     |
| <i>Cdk4</i>             | CCAATGTTGTACGGCTGATGG     | TGTCCAGGTATGCTCCTCAGGT   |
| <i>p16</i>              | CCGCCTTTTTCTTCTAGCTT      | TCCCTCCCTCCTCTGCT        |
| <i>P18</i>              | CGAGCAGCACTCTGGACTAC      | AGGCTCGGCCAATCTTTAG      |
| <i>P21</i>              | GTGGCCTTGTCTGCTGCTT       | GCGCTTGGAGTGATAGAAATCTG  |
| <i>P27</i>              | TCTCTTCCGCCCAGCAAT        | GGGGCTTATGATTCTGAAAGTCG  |
| <i>Scl promoter</i>     | AAAATGAATCATTGGCCATAA     | CGAGATAAGGAGCCGCCCTC     |
| <i>Scl +19 enhancer</i> | CTCCACACAATAACAGGATGTGATC | CAGATAGAAGCTTGAGGTAGGGCT |
| <i>Bmp4 -1034 site</i>  | CTCTTAGCCTGGCTCACCTT      | CTAGCTGGGAGGTGGAATGT     |
| <i>Bmp4 -392 site</i>   | CAATCCAACAGCTCCCTTCT      | ATAACTGCTGCCAAACTGA      |
| <i>Bmp4 TGE site</i>    | TTGAAGAAGCCACGCTGA        | AGAAGCCACGCTGAGATCAT     |

Subsequent steps were performed as previously described (Park et al., 2004). The GATA2 antibody used was the same as in the above ChIP experiments.

#### BrdU uptake assays

Assays were performed with the Cell Proliferation Biotrak ELISA System 2 (Amersham Biosciences). On day 2 or 3 of EryP formation, cells were recovered by cellulase treatment. Cells ( $3 \times 10^3$  and  $1 \times 10^4$ ) were labeled with BrdU and cultured overnight in media containing IMDM, 15% PDS and 2 units/ml EPO with or without Dox. Cells were prepared according to the manufacturer's protocol for examination on a plate reader. A 'no BrdU' condition was set up to determine the background absorbance of the cells and subsequently subtracted from all values. 'No Dox' absorbance values were normalized to 1 and the absorbance of the Dox-treated cells was normalized against the control value to give a relative BrdU incorporation level.

#### EB sprouting assays

Assays were based upon aortic ring assays (Nicosia and Ottinetti, 1990a; Nicosia and Ottinetti, 1990b; Wang et al., 2004). Growth Factor Reduced Matrigel (BD Biosciences) was diluted 1:1 with IMDM containing 2% FCS and 50  $\mu$ l was plated into wells of a 96-well plate and allowed to polymerize for 40 minutes at 37°C. A single D6 EB was recovered from SR differentiation media and placed on the Matrigel bed, and an additional 50  $\mu$ l was then plated on top of the EB. The upper layer was incubated for 40 minutes at 37°C before media containing IMDM, 2%FCS and 30 ng/ml VEGF was added. EBs were cultured for an additional 6 days and the sprouting pattern was scored. For LDL uptake studies, the upper matrigel layer was omitted and DiL-Ac-LDL (Biomedical Technologies, Inc.) was added at 10  $\mu$ g/ml and incubated for 3 hours. Medium was removed and EBs washed three times with fresh media and then images captured.

## RESULTS

### Expression profiling of the hemangioblast

To identify genes involved in regulating the molecular pathway from mesoderm to hematopoietic and endothelial cells, we performed analyses of global gene expression in the in vitro hemangioblast (BL-CFC) cell population (i.e. Flk-1<sup>+</sup>Scl<sup>+</sup> cells from D2.75 EBs), and their differentiated progeny, Blast cells. Two independent hemangioblast and Blast cell populations were prepared and used to make parallel RNA samples and then each hybridized to Affymetrix U74Av2 GeneChips. The analyses of gene expression differences between the BL-CFC and Blast population resulted in 292 gene-symbol-annotated, unique transcripts that were enriched in the BL-CFC population, and 375 transcripts enriched in Blast cells. The 37 genes with transcription regulating functions that were enriched in the hemangioblast cell population are shown in Fig. 1A. We used a bioinformatic program that analyzes gene expression profiles based on the gene ontology (GO) terms representing the genes enriched in each profile (Doherty et al., 2006). This allowed us to define patterns across stem and differentiated cell datasets originating from several different investigators, each using different methods. Of the hemangioblast-enriched genes, about 30% were classified under the GO term 'nucleus', 15% each represented 'DNA-binding' and 'regulation of transcription', and 5-10% each were 'nucleic acid-binding' and 'RNA-binding' genes (Fig. 1B). The enrichment in those GO terms caused the hemangioblast cell population to cluster with profiles of other stem cell populations including hematopoietic, neural and gastric stem cells (Fig. 1C). Thus, the analysis suggested considerable similarity in the types of genes expressed by stem cells of multiple tissues and, moreover, revealed the previously undescribed stem cell phenotype of the BL-CFCs.

### Gata2 in differentiating ES cells

Our array data also provided us with potential targets that may be important for regulation of hemangioblast specification from mesoderm. We observed high expression of *Gata2* in the

hemangioblast relative to its more committed progeny (Fig. 1A). Our previous data showed that BMP4 signals were able to induce Flk-1<sup>+</sup> as well as Scl<sup>+</sup> cells from ES cells in culture (Park et al., 2004). Thus, we tested if *Gata2* was a direct target of BMP4. To this end, we differentiated ES cells in serum-free [i.e. serum-replacement (SR)] media for 2 days, treated them with BMP4 and cycloheximide and then harvested EBs after an hour of stimulation to examine *Gata2* expression. As shown in Fig. 2A, BMP4 treatment led to a large increase in *Gata2* mRNA within 1 hour, and this increase was maintained in the presence of cycloheximide. This demonstrated that *Gata2* was a direct target of BMP4 signaling. Importantly, *Flk1* and *Scl* were not upregulated following an hour of BMP4 treatment (not shown).

Next, we examined expression kinetics of *Gata2* in differentiating ES cells, in relationship to other key differentiation markers including *Rex1* (*Zfp42* – Mouse Genome Informatics), brachyury, *Flk1* and *Scl*. To this end, A2Lox ES cells, a derivative of E14Tg2a ES cells (see below), were differentiated for 5 days in serum-containing differentiation media and harvested at each day for qRT-PCR analysis. The ES gene *Rex1* has been shown to be rapidly downregulated as ES cells begin to differentiate (Faloon et al., 2000). As expected, *Rex1* expression was rapidly downregulated after day 0 (D0) and expression was lost after D2 (Fig. 2B). Concurrently at D2 of differentiation, brachyury was detected and then peaked at D3. Shortly after the generation of brachyury<sup>+</sup> mesoderm, *Gata2* and *Flk1* were induced and their expression rapidly increased, peaking at D4. Lastly, *Scl* expression was detectable shortly after *Flk1* and peaked at D5 (Fig. 2B). *Gata1* and *cKit* began to be expressed at D4 and their expression increased at D5 and thereafter (not shown). These data indicate that as A2Lox ES cells differentiate and generate mesoderm, *Gata2* and *Flk1* are amongst the first genes expressed (Fig. 2B). Thus, consistent with previous reports from *Xenopus* models, *Gata2* is rapidly induced by BMP4 from brachyury<sup>+</sup> mesoderm and precedes the generation of more committed hematopoietic genes in the ES/EB system.

### The specification and differentiation of Flk-1<sup>+</sup> mesoderm by GATA2

To determine if *Gata2* plays a role in hemangioblast development and differentiation, we utilized the ES/EB system. Given the expression kinetics of *Gata2* in differentiating EBs, we sought to induce GATA2 at specific stages of EB generation and differentiation to accurately address the role that GATA2 plays once ES cells have differentiated to mesoderm (brachyury<sup>+</sup>). To this end, we targeted the tet-responsive locus of A2Lox cells [an E14Tg2a-based ES cell line, similar to Ainv15 (Kyba et al., 2002), but with superior targeting efficiency (M.K., unpublished)] with the *Gata2* cDNA. To facilitate detection of *Scl*-expressing cells, we also knocked-in a non-functional human CD4 (hCD4) into the *Scl* locus, as described previously (Chung et al., 2002) (Fig. 2C). Once the correct targeting event was confirmed by a tet-responsive locus/cDNA-vector-specific PCR, inducible *Gata2* expression was verified by adding doxycycline (Dox) to differentiating EB cells. As shown in Fig. 2D, exogenous GATA2 protein was readily detectable in day 4 EBs with Dox concentrations as low as 0.03  $\mu$ g/ml. For all subsequent studies with this inducible GATA2 (iGATA2) ES cell line, we applied 0.3  $\mu$ g/ml of Dox, at which concentration no cytotoxicity was observed (not shown).

Employing these cells, we first studied the GATA2-mediated transcriptional program. Cells were differentiated in SR media, GATA2 was induced at D2 of culture (brachyury<sup>+</sup> stage), differentiated for an additional 2 days and the gene expression

profile was examined. To assess the genetic program mediated by GATA2, we utilized a candidate gene approach to examine a number of specific cell types including mesoderm, hematopoietic, cardiogenic, endoderm and ectoderm (Fig. 3A). The expression of brachyury was downregulated in GATA2-induced cells as compared with non-induced control cells. As ES cells differentiated in SR media have a longer window of brachyury expression in the absence of differentiating cues such as BMP4 (Park et al., 2004), we reasoned that the expression of GATA2 accelerated the differentiation of brachyury<sup>+</sup> mesoderm into more-differentiated mesodermal derivatives. Accordingly, the expression of *Bmp4* and *Pdgfra* was increased, arguing that GATA2 promoted the differentiation of mesoderm into its derivatives (Fig. 3A). We examined a set of genes that would provide insight into how GATA2 regulates the differentiation of Flk-1<sup>+</sup> mesoderm. Specifically, *Flk1*, *Scl*, *Gata1* and *Kit*, were all expressed at higher levels when GATA2 was induced (Fig. 3A). Additionally, the cardiogenic genes *Hand2*, *Nkx2-5* and *Gata4* were also upregulated upon GATA2 induction, consistent with Flk-1<sup>+</sup> mesoderm giving rise to cardiac tissues (Iida et al., 2005; Kouskoff et al., 2005; Wang et al., 2006). Lastly, induction of GATA2 led to a marked reduction in the expression of the endodermal genes *Hnf3β* (*Foxa2*—Mouse Genome Informatics), *Hnf4* and *Ttr* as well as the ectodermal genes *Fgf5* and *Neurod1*. In the context of mesoderm differentiation, GATA2 has a positive effect upon hematopoietic and cardiogenic mesoderm formation and suppresses endoderm and ectodermal lineages.

To analyze the mechanism whereby *Bmp4* mRNA was upregulated under GATA2 induction, we compared human *BMP4* (Ensembl.org gene ENSG00000125378) and mouse *Bmp4* loci (Ensembl ENSMUSG00000021835) utilizing the Vista web software (Frazer et al., 2004) (<http://genome.lbl.gov/vista/index.shtml>) as well as the rVista program for identification of transcription factor-binding sites (Loots et al., 2002). We identified three conserved GATA-factor-binding sites (WGATAR, where W is A or T, and R is A or G) (Bresnick et al., 2005) between mouse and human: the first, 1034 bp upstream of the first exon (−1034 site); the second, 392 bp upstream of the first exon (−392 site); and an inverted repeat pair (Tandem GATA Enhancer, or TGE, site) located 3.9 kb into the first intron (Fig. 3B). This inverted repeat is similar to the pair seen in the *Gata1* locus capable of conferring *Gata1* activity in eosinophils (Yu et al., 2002). Moreover, this TGE site shows tremendous conservation amongst Mouse, Human, Rat, Dog, Monkey and Chimp (Fig. 3B). To examine whether these conserved sites were relevant in vivo, we used quantitative ChIP to measure GATA2-chromatin interactions in the parental A2Lox ES cell line. Specifically, A2Lox ES cells were differentiated for 4 days in serum and crosslinked to capture protein-DNA binding interactions. After immunoprecipitation with an anti-GATA2 antibody, the recovered genomic material was subjected to quantitative PCR. As shown in Fig. 3C, GATA2 occupied the TGE during stages of A2Lox ES cell differentiation. To confirm the relationship between GATA2 and *Bmp4* expression, we took advantage of the knock-in *Scl*<sup>hCD4/+</sup> allele

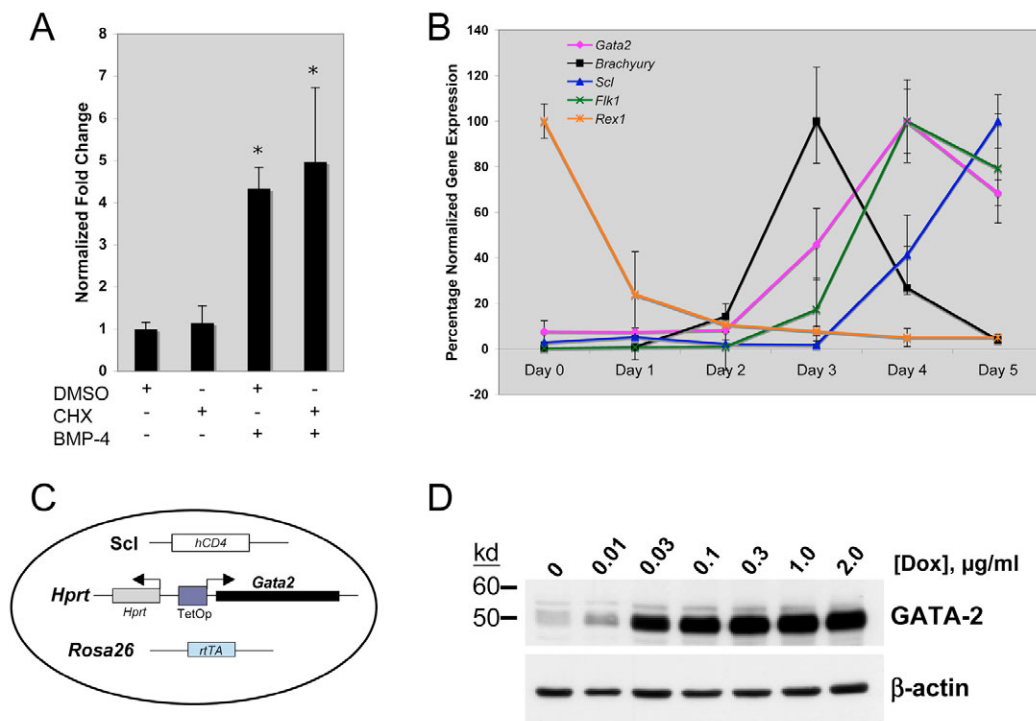

**Fig. 2. GATA2 in differentiating ES cells and the generation of inducible ES cells. (A)** Rapid induction of *Gata2* upon short-term treatment with BMP4. ES cells were differentiated for 2 days in the absence of serum, collected and treated with BMP4, or 10 μg/ml cycloheximide (CHX), or DMSO for 1 hour. *Gata2* expression was analyzed and normalized to *Gapdh*. The quantity of *Gata2* expressed in untreated cells was normalized as 1 and used to determine the *Gata2* quantity in BMP4-treated samples. Values indicate mean ± s.e.m.; \*,  $P < 0.01$  versus control. **(B)** Expression kinetics of candidate genes in A2Lox ES cells. RNA from EBs differentiated in serum was utilized in qRT-PCR assays. Candidate genes were first normalized against *Gapdh* and then the maximal expression for each gene was assigned 100% and the according value for each EB day determined against this 100% value. **(C)** Schematic of the iGATA2 ES line used, with indicated loci carrying alterations allowing for production of the rtTA, expression of the *Gata2* cDNA and generation of hCD4 as a surrogate marker for *Scl*. **(D)** Western blot of the iGATA2 ES line. Cells were differentiated in serum for two days, treated with the indicated concentrations of Dox and differentiated for two additional days. EB lysates were subjected to SDS-PAGE followed by blotting with GATA2 and β-actin antibodies.

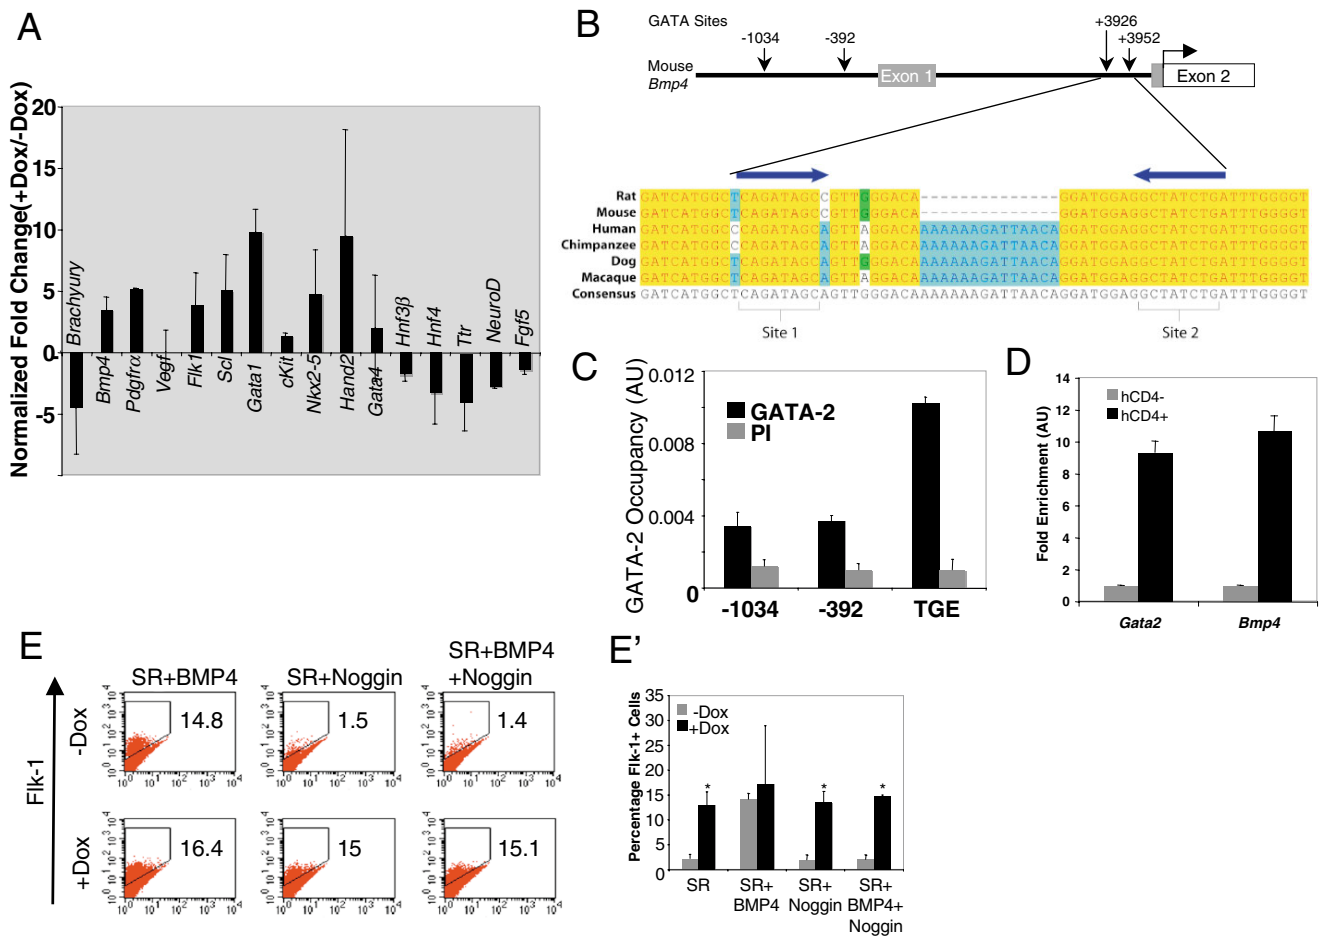

**Fig. 3. Enforced GATA2 results in an increase in mesodermal gene expression.** (A) iGATA2 ES cells were differentiated for 2 days in SR and treated with 0.3  $\mu$ g/ml Dox for an additional 2 days. RNA was then utilized for qRT-PCR to examine the genes indicated. Genes were normalized against *Gapdh* and then the ratio of the gene quantity (+Dox) to gene quantity (-Dox) was determined to yield normalized fold change. (B) Upper portion depicts the mouse *Bmp4* locus. Gray boxes are non-translated exons and the open box indicates the translated exon. Coordinates and arrows indicate conserved, consensus GATA-factor-binding sites. Enlarged below is a section containing the TGE of a 5' to 3' alignment of highly conserved, intronic regions of homologs of the *Bmp4* gene. GATA sites 1 and 2 are indicated by brackets; arrows above the alignment indicate GATA site orientation. (C) ChIP analysis of GATA2 occupancy of the *Bmp4* locus in D4 EBs. A2Lox ES Cells were differentiated for 4 days in serum, crosslinked with 1% formaldehyde and processed to examine GATA2 occupancy at the three conserved consensus GATA-factor-binding sites. (D) *Bmp4* enrichment in *Gata2*-expressing cells. iGATA2 ES cells were differentiated in SR medium for 4 days and Dox added on D2. At D4, cells were stained for hCD4 expression and sorted into hCD4<sup>-</sup> and hCD4<sup>+</sup> and then RNA generated for qRT-PCR to examine co-enrichment of *Gata2* and *Bmp4* in hCD4<sup>+</sup> cells. (E) FACS analyses of Flk-1<sup>+</sup> cell generation by GATA2 and BMP4. Cells were differentiated in SR medium for 2 days and then treated with combinations of Dox (0.3  $\mu$ g/ml), BMP4 (5 ng/ml) and noggin (10 ng/ml). Cells were utilized for FACS analyses on D3. Numbers indicate percentage of Flk-1<sup>+</sup> cells generated. (E') Summary data of four independent sets of FACS experiments showing the percentage of Flk-1<sup>+</sup> cells generated in each condition. Values indicate mean $\pm$ s.e.m.; \*,  $P < 0.01$  versus untreated.

in iGATA2 ES cells and reasoned that hCD4<sup>+</sup> cells generated by Dox addition (see below) could be used to isolate cells that expressed exogenous GATA2. As shown in Fig. 3D, in cells sorted as hCD4<sup>+</sup>, there was a large enrichment of both *Gata2* and *Bmp4*, indicating that the expression levels of *Bmp4* correlated to *Gata2* expression. This suggests a unique regulatory mechanism whereby BMP4 is capable of inducing *Gata2* expression and GATA2 in turn contributes to the direct activation of *Bmp4*.

To understand the relationship between BMP4 and GATA2 in the generation of Flk-1<sup>+</sup> mesoderm, iGATA2 cells were differentiated in SR media. At D2, cells were treated with various combinations of BMP4, noggin and Dox to assess GATA2 function in generating Flk-1<sup>+</sup> cells (Fig. 3E,E'). As previously

reported (Park et al., 2004), the addition of BMP4 was sufficient to generate Flk-1<sup>+</sup> cells. More importantly, GATA2 alone could also generate Flk-1<sup>+</sup> cells. When GATA2 was induced in the presence of BMP4, the Flk-1<sup>+</sup> cell generation was similar. Furthermore, GATA2 could still generate Flk-1<sup>+</sup> cells when BMP4 was blocked by noggin. We compared the human *KDR* and mouse *Flk1* loci for regions of homology and discovered three conserved GATA-binding sites within 10 kb upstream of the *Flk1* gene. However, ChIP assays did not indicate in vivo occupancy by either GATA2 or GATA1. Collectively, these data argue that GATA2 is a downstream component of BMP4-mediated signals that regulate Flk-1<sup>+</sup> mesoderm generation, but that such regulation is not mediated by the 10 kb proximal region of *Flk1*.

### Hemangioblast, hematopoietic and endothelial cell generation by GATA2

To determine the role of GATA2 in the generation of  $Scl^+$  cells and their progeny, iGATA2 cells were differentiated in serum, SR, or SR containing BMP4 in the presence or absence of Dox (at D2 of culture), and  $hCD4^+$  cells were assessed by FACS analyses on D4 or D5. Previous work has shown that BMP4 could generate a moderate level of  $hCD4^+$  cells in the absence of serum but that a more robust level of  $hCD4^+$  cells could be generated when BMP4 and vascular endothelial growth factor (VEGF) were added together (Park et al., 2004). Fig. 4A shows that the induction of GATA2 in the absence of serum resulted in a high level (~50%) of  $hCD4^+$  cells at D5, whereas less than 3% of cells became  $hCD4^+$  in SR media. Importantly, GATA2 induction did not increase the expression of *Vegf*, arguing that GATA2 induction of  $Scl^+$  cells is independent of VEGF signaling (Fig. 3A). Consistent with previous studies (Park et al.,

2004), the addition of BMP4 to the media was able to augment generation of  $hCD4^+$  cells to ~13%. There was no additive effect between BMP4 and GATA2 on  $Scl$  expression, as the addition of BMP4 to cells with enforced GATA2 expression did not change the generation of  $hCD4^+$  cells as compared with that of GATA2 alone (Fig. 4A,A').

We analyzed the mechanism whereby GATA2 activated *Scl* expression during early embryonic and hematopoietic development. Similar to the promoter analysis described above for the *BMP4/Bmp4* loci, we compared more than 25 kb of the human *SCL* (Ensembl: ENSG00000162367) and mouse *Scl* (Ensembl: ENSMUSG00000028717) loci using the Vista and rVista programs. We first found consensus GATA-factor-binding sites (Bresnick et al., 2005) and then determined which of these sites were conserved between human and mouse. Strikingly, although there were abundant WGATAR sites in both species (27 in human, 33 in

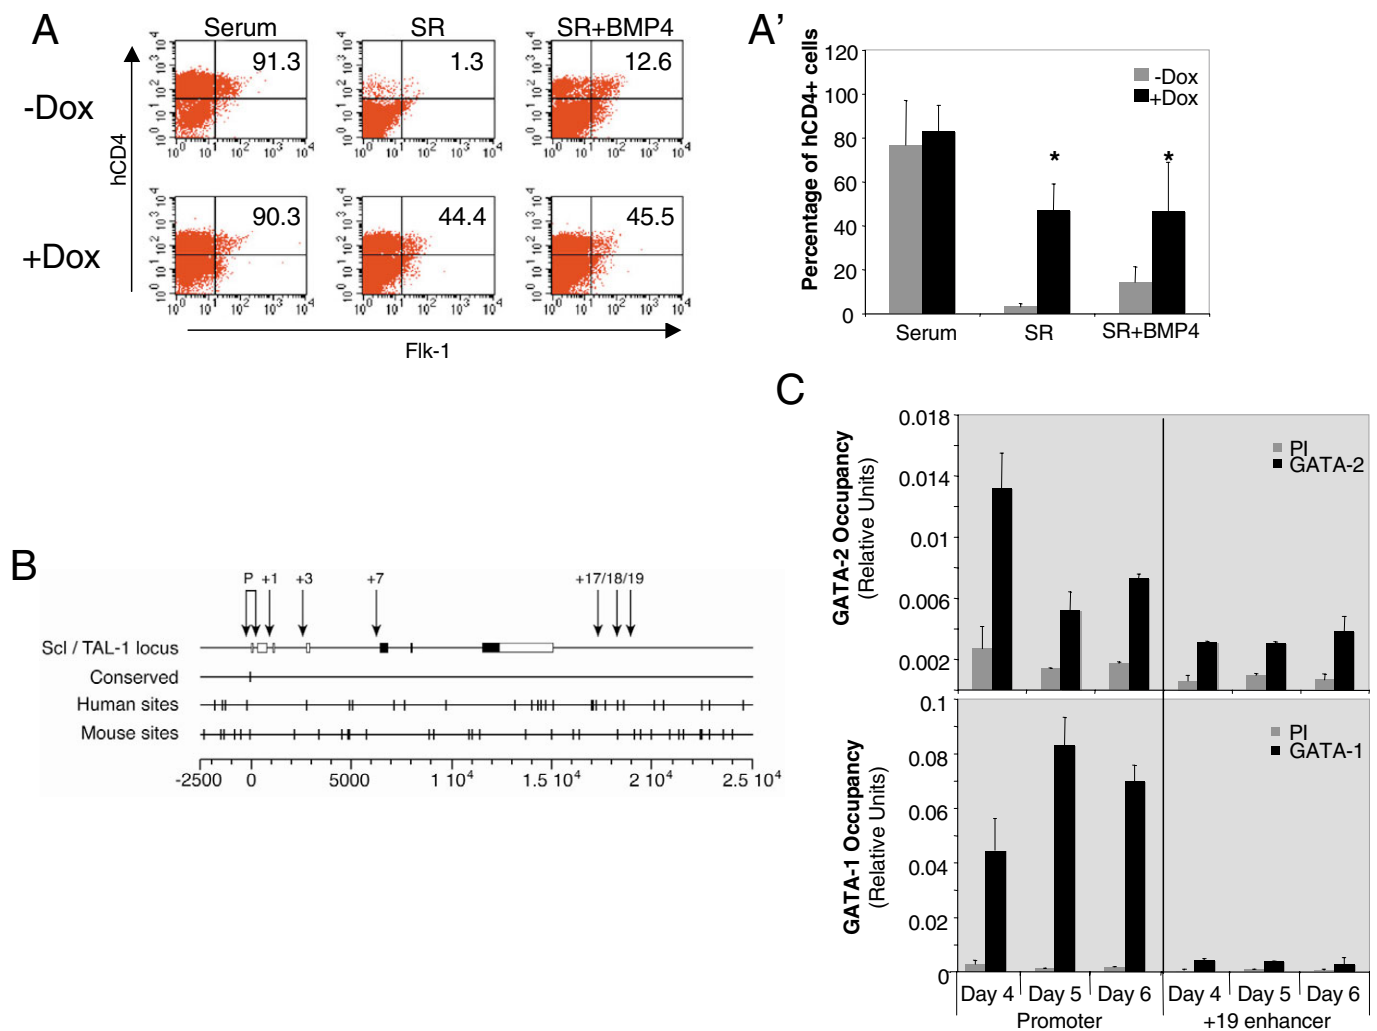

**Fig. 4. GATA2 regulates *Scl* expression.** (A) FACS data of  $hCD4^+$  ( $Scl^+$ ) cell generation. Cells were grown in serum, SR, or SR+BMP4 as indicated, were treated with or without Dox at D2, and FACS performed on D5 for  $Flk-1^+$  and  $hCD4^+$  cells. Numbers indicate total percentage of  $hCD4^+$  cells ( $Flk-1^+hCD4^+$  and  $Flk-1^-hCD4^+$ ). (A') Summary data of five independent sets of FACS experiments showing the percentage of  $hCD4^+$  cells generated in each condition. Values indicate mean ± s.e.m.; \*,  $P < 0.01$  versus untreated. (B) Comparison of human *SCL* and mouse *Scl* loci. P indicates alternate promoters, and numbers indicate DNase I hypersensitive sites (Gottgens et al., 2002). Black boxes and white boxes indicate translated and untranslated exons, respectively. Vertical dashes indicate consensus (WGATAR) GATA-factor-binding sites. The bottom line indicates general locus coordinates, where 1 is the start of transcription. (C) Quantitative ChIP assays for GATA-factor occupancy of the *Scl* loci. Upper panel shows GATA2 occupancy, measured against a standard curve of input dilutions. Individual measurement parameters (EB day, *Scl* locus site) are the same as on the bottom panel. Bottom panel shows GATA-1 occupancy. Values are mean ± s.e.m. for three independent experiments.

mouse), only a single site was conserved between the two species (Fig. 4B). This site, identified in the human *SCL* gene as capable of binding GATA1 and GATA2, is 37 bp upstream of the transcriptional start site of *SCL* (Aplan et al., 1992). In the mouse locus, this site resides 34 bp upstream of the transcriptional start site. Importantly, the GATA site in the +19 enhancer region previously posited to confer hematopoietic specificity during development (Gottgens et al., 2002; Gottgens et al., 2004) was not a consensus WGATAR site in human. We examined the *Scl* locus during differentiation in the parental A2Lox ES line, reasoning that GATA-factor-binding may be developmentally dynamic in the control of *Scl*. To this end, we performed quantitative ChIP analyses using D4, D5 and D6 EBs and tested both GATA2 and GATA1 occupancy at the -34 promoter site as well as the +19 enhancer site (Fig. 4C). At D4 of EB formation, which is the early stage of *Scl*<sup>+</sup> cell generation, GATA2 preferentially occupied the *Scl* promoter. GATA1 was also detected

at the promoter at D4 and importantly, as differentiation progressed, GATA2 was displaced from the promoter and GATA1 was bound at higher levels at D5 and D6. During all stages of EB development, negligible signals were detected at the +19 enhancer (Fig. 4C).

Acquisition of *Scl* expression within Flk-1<sup>+</sup> cells points to a differentiation cue for the hemangioblast (Chung et al., 2002; Park et al., 2005). To determine if GATA2 plays a role in the generation and differentiation of the hemangioblast, we first differentiated J1(WT) and *Gata2*<sup>-/-</sup> ES cells and replated these cells for Blast colonies. As shown in Fig. 5A, *Gata2*<sup>-/-</sup> cells generated far fewer Blast colonies as compared with wild-type ES cells. Furthermore, the expression of *Scl* and *Gata1* was significantly lower in *Gata2*<sup>-/-</sup> EBs, consistent with the upregulation of these genes in induced iGATA2 cells (Fig. 5B). Next, we performed assays for Blast colonies and primitive erythroid (EryP) cells as well as FACS analyses for cells expressing endothelial surface markers using

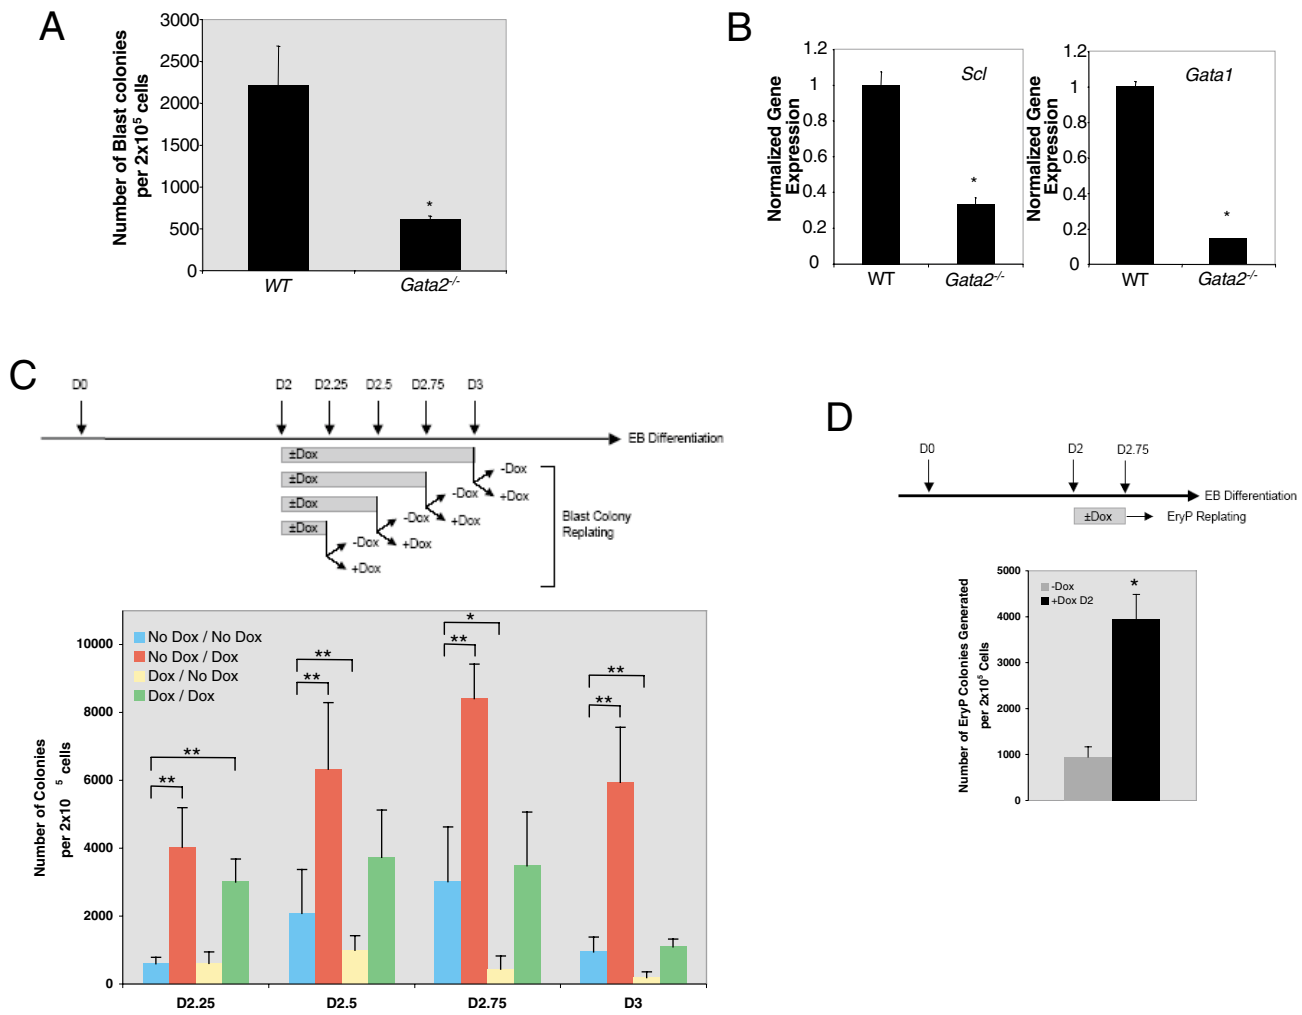

**Fig. 5. GATA2 specifies hemangioblast development.** (A) Blast colony formation in wild-type (WT) (J1) or *Gata2*<sup>-/-</sup> ES cells. Values are mean±s.e.m. for three independent experiments; \*, *P*<0.05 versus WT. (B) qRT-PCR of *Scl* (left panel) and *Gata1* (right panel) in WT and *Gata2*<sup>-/-</sup> ES cells. RNA was from D5 EBs and normalized against *Gapdh*. Values are mean±s.e.m., from qRT-PCR reactions performed in triplicate using two independent RNA samples; \*, *P*<0.05 versus WT. (C) GATA2 induction scheme in differentiating EBs and formation of Blast colonies. Above is the scheme used to generate Blast colonies. Uppermost numbers indicate EB day. Lower gray bars indicate duration of Dox treatment and subsequent treatment of replated EBs. Below is a bar chart displaying Blast colony formation analyses of iGATA2 cells. The x-axis shows the day of EB harvest and replating to assay for Blast colony analysis. The key indicates whether or not Dox was added (1) at D2, during EB formation conditions (before slash); and (2) during growth in semi-solid replating media (after slash). Values are mean±s.e.m., average of three to five individual experiments; \*, *P*<0.05; \*\*, *P*<0.005. (D) EryP Potential of D2.75 iGATA2 EBs. Cells were grown in serum and treated with or without Dox at D2 and harvested and replated for EryP colonies on D2.75. Values are mean±s.e.m. from two to four independent experiments; \*, *P*<0.05 versus untreated.



iGATA2 ES cells. In differentiating ES cells, the highest Blast colony number is typically obtained by replating D2.75 EB cells, as represented by the blue bars (No Dox/No Dox) in Fig. 5C. We first determined whether induction of GATA2 augments BL-CFC generation. To this end, Dox was added to differentiating EBs on D2 and EBs were replated on D2.75 for Blast colony assays. As shown in Fig. 5C, there was no increase in Blast colony number (Dox/No Dox). Rather, the number of Blast colonies was reduced when Dox was added on D2 (Fig. 5C, yellow bars). Even when we replated at earlier time points, specifically D2.25 and D2.5, we saw no significant increase in the number of Blast colonies generated (Fig. 5C, yellow bars). We reasoned that the induction of GATA2 from D2 may drive the hemangioblast to rapidly differentiate into its progeny. Thus, we evaluated the induction of GATA2 at the time of replating. As shown in Fig. 5C, the Blast colony number was greatly increased when Dox was added solely to the replating media (No Dox/Dox). This was true for all EB replating time points, i.e. D2.25, D2.5, D2.75 and D3 (Fig. 5C, orange bars). We saw no difference in the percentage of individual Blast colonies capable of generating both hematopoietic and endothelial cells between induced and control cells (not shown). Lastly, induction of GATA2 from D2 and in the

replating media (Dox/Dox, green bars in Fig. 5C) generated an increase in Blast colonies at early stages (D2.25-D2.5 replating), but resulted in no change in colony number, as compared with untreated control cells (Fig. 5C, blue bars), at later time points (D2.75 and D3 replating). The systemic modulation scheme of *Gata2* expression suggested a true transient nature of the hemangioblast. If the hemangioblast were truly transient, we reasoned that the induction of GATA2 from D2 would lead to the precocious emergence of EryP cells. To this end, D2.75 EBs that had been treated with Dox at D2 were replated for EryP colonies. Whereas a modest number of EryP colonies could be generated from untreated D2.75 EBs, GATA2 induction led to a significant increase in EryP colonies, similar to the number generated from untreated D4 EBs (the peak of EryP colony generation) (compare Fig. 5D with Fig. 6B).

We next determined if GATA2 could directly affect the generation of EryP colonies independent of hemangioblast formation (i.e. at a time after the period when the transient hemangioblast is present). To this end, we compared the generation of EryP colonies in iGATA2 cells induced from D2 and D3. We discovered that the addition of Dox at D2 or D3 generated significantly higher numbers of EryP colonies as compared with non-induced cells (Fig. 6B).

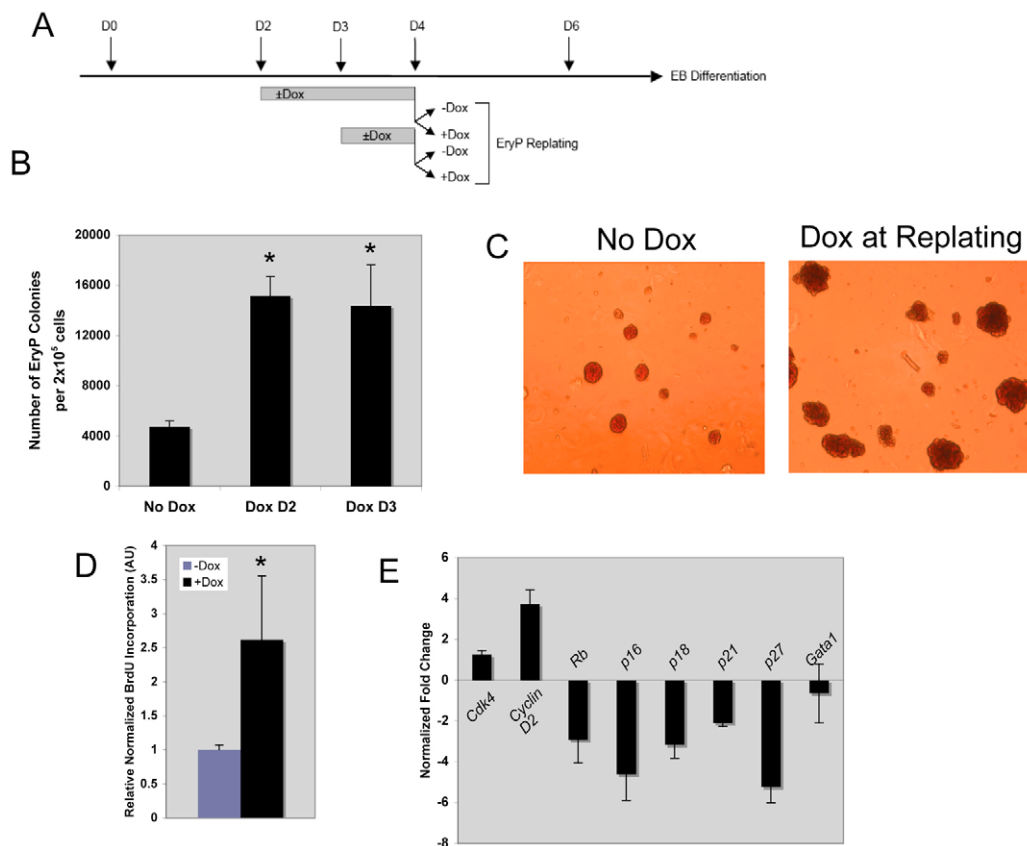

**Fig. 6. Augmented EryP generation and cell proliferation by GATA2.** (A) GATA2 induction scheme in differentiating EBs and formation of EryP colonies. Above is the scheme used to generate Blast colonies. Uppermost numbers indicate EB day. Lower gray bars indicate duration of Dox treatment and subsequent treatment of replated EBs. (B) EryP potential of D4 iGATA2 EBs treated with or without Dox at D2 or D3. Values are mean  $\pm$  s.e.m., from four independent experiments; \*,  $P < 0.05$  versus untreated. (C) Representative bright field images (100 $\times$ ) of EryP colonies from D4 EBs replated in the absence (left) or presence (right) of Dox. (D) BrdU incorporation in EryP cells treated with or without Dox during replating. Values are normalized by subtracting background absorbance and then the BrdU incorporation in untreated EryP cells is normalized to 1. Values are mean  $\pm$  s.e.m. from six independent experiments; \*,  $P < 0.005$  versus untreated. (E) Cell cycle gene expression profile of iGATA2 EryPs with or without Dox during EryP colony formation. EryP cells from day 2 or 3 of EryP colony formation were harvested and RNA utilized for qRT-PCR assays. Genes were normalized against *Gapdh* and then the ratio of +Dox to -Dox determined, where values  $< 1$  were assigned their inverse to give a negative fold change. Values are mean  $\pm$  s.e.m. from four independent RNA sets.

When D4 cells were induced with Dox at replating, we saw that although this late-stage induction had a modest, albeit significant, effect upon the number of EryP colonies generated, the colonies themselves were bigger when Dox was added to the EryP replating media (Fig. 6C). The average cellularity of a non-induced EryP colony was  $46.3 \pm 10$  cells per colony, whereas the induction of GATA2 at replating resulted in EryP colonies with an average  $82.1 \pm 10.7$  cells per colony. The expansion of the EryP colonies under enforced GATA2 expression led us to reason that EryP cells were cycling at a higher rate than control cells.

To further validate this notion, we examined cell proliferation using BrdU labeling. During EryP formation, cells were recovered from their replating media by cellulase treatment and grown in the presence of BrdU, with or without Dox. On average, the BrdU uptake in Dox-treated cells was more than twice the uptake in untreated EryP cells, indicating greater proliferation in the presence of exogenous GATA2 (Fig. 6D). In examining previous reports investigating GATA1 (Rylski et al., 2003; Pan et al., 2005) as well as our own array data, we discovered that a small subset of cell cycle genes are relevant to this phenomenon, including the tumor suppressor *Rb* (*Rb1* – Mouse Genome Informatics), the cyclin complex components *Cdk4* and *Ccnd2* (Cyclin D2) and the CDK inhibitors (CDKIs) *p16<sup>INK4a</sup>*, *p18<sup>INK4c</sup>*, *p19<sup>ARF</sup>*, *p21<sup>WAF1</sup>* and *p27<sup>KIP1</sup>*. These genes show altered expression dependent upon the status of GATA1 (Rylski et al., 2003; Pan et al., 2005). Specifically, the induction of GATA1 results in the suppression of *Cdk4* and *Ccnd2* and the activation of the CDKI family members as well as of *Rb*. To examine the gene expression of EryP cells upon GATA2 induction, EryP cells were harvested and utilized for qRT-PCR assays. The results showed that cells with enforced GATA2 had lower expression levels of the negative regulators *Rb* and CDKI family members, and increased expression levels of *Cdk4* and *Ccnd2* (Fig. 6E). Importantly, this alteration was unlikely to be due to a change in *Gata1* expression, as the enforced expression of GATA2 led to only a minor suppression of *Gata1* (Fig. 6E).

To examine the endothelial potential of iGATA2 ES cells, D2 EBs were induced and differentiated for four additional days and subjected to FACS analyses for endothelial cell surface markers. As shown in Fig. 7B, induction of GATA2 from D2 resulted in a dramatic increase in Tie2<sup>+</sup> cells. Additionally, GATA2 induction from D2 also led to an increase in the number of CD31<sup>+</sup> as well as of CD31<sup>+</sup>VE-Cadherin<sup>+</sup> cells, arguing for an increase in endothelial cells generated from D6 EBs (Fig. 7C,C'). In an effort to further validate an increase in generation of endothelial cells in the presence of GATA2, we modified the aortic ring assay (Nicosia and Ottinetti, 1990a; Nicosia and Ottinetti, 1990b) so as to use EBs in place of sections of adult aorta. D6 EBs grown in SR media with or without Dox from D2 were sandwiched in Matrigel and allowed to sprout for 6 days in the presence of VEGF. We observed a profound phenotypic variance in the nature of the sprouts that were generated based upon GATA2 status. In the absence of GATA2, EBs developed thin, tendril-like sprouting structures (Fig. 7D,D',G), whereas EBs grown in the presence of Dox developed flat, heterogeneous-shaped cells that appeared to be endothelial cells (Fig. 7E,E',G). We sought to verify the nature of these cells, and tested whether they could take up acetylated low-density lipoproteins, a characteristic of endothelial cells (Voyta et al., 1984). The sprouting cells generated from EBs grown in the presence of Dox were indeed able to take up the Dil-Ac-LDL (Fig. 7F,F'), whereas the tendril-like structures from EBs grown the absence of Dox were not Dil-Ac-LDL<sup>+</sup> (not shown). Collectively, these data argue that GATA2 regulates the generation of BL-CFC, hematopoietic and endothelial cells.

## DISCUSSION

### The gene expression profile of the hemangioblast

The hemangioblast, through careful analyses, has been proven to be a single cell capable of giving rise to both hematopoietic and endothelial cells in culture (Choi et al., 1998; Nishikawa et al., 1998; Faloon et al., 2000; Chung et al., 2002; Ema et al., 2003; Huber et al., 2004). The present work sought to uncover a molecular signature of the hemangioblast and to define mechanisms that regulate hemangioblast development. The expression profile of the Flk-1<sup>+</sup>Scl<sup>+</sup> (hemangioblast) cells derived from D2.75 EB cells was most similar to the other stem cell populations, sharing with them the expression of a number of transcription factors as well as other genes with RNA- and DNA-binding functions. Additionally, the arrays identified a number of factors preferentially expressed in the hemangioblast. Certainly, genes that are common with other stem cells could be important for further determining whether a common pathway exists amongst different stem cell populations in maintaining 'stem-ness'. Conversely, studying genes that are uniquely expressed in the hemangioblast cell population will be crucial for understanding how hematopoietic and vascular systems are established.

### GATA2 and BMP4 in mesoderm differentiation

The discovery of *Gata2* and characterization of its expression pattern (Minko et al., 2003), and the knockout phenotype of *Gata2*<sup>-/-</sup> animals (Tsai et al., 1994), implicated *Gata2* as an ideal candidate in molecular control of hemangioblast development and differentiation. A number of reports have implicated GATA factors as being downstream of BMP4 signaling, including *Gata2* (Maeno et al., 1996; Friedle and Knochel, 2002) and *Gata4* (Rojas et al., 2005). Here, we demonstrated that *Gata2* was directly induced by BMP4 and that GATA2 activated *Bmp4* expression. Although we discovered three conserved GATA-factor-binding sites in the *Bmp4* locus (-1034, -392 and the TGE site), we showed that GATA2 occupies the TGE site more abundantly than either the -1034 or -392 sites. Previous work showed that GATA4 and GATA6 utilized the -392 GATA site and a non-canonical site at -526 to transactivate the *Bmp4* promoter during cardiomyogenesis (Nemer and Nemer, 2003). Given the importance of BMP4 in mesodermal differentiation (Winnier et al., 1995), as well as the importance of the GATA factors in development, there may be differential control of *Bmp4* in early hematopoietic/endothelial tissues as compared with cardiomyocytes, and these differences may presumably account for different mechanisms conferred by GATA2 or GATA4/6, respectively. Specifically, our studies suggest that GATA2 occupies the TGE site of *Bmp4* and that BMP4 signals in turn activate *Gata2* transcription, creating an autoregulatory mesodermal differentiation loop during early development. By contrast, the -392 (or -526) sites may be bound by GATA4/6 during later time points of cardiomyogenesis (Nemer and Nemer, 2003). Future experiments examining the in vivo occupancy of *Bmp4* in different tissues, as well as loss-of-function studies with candidate trans-acting factors, will be required to discern the tissue-specific control of *Bmp4* during development.

Our studies indicate that cardiogenic genes including *Hand2* and *Nkx2-5* were induced upon enforced GATA2 expression. Moreover, when EBs were differentiated in the presence of Dox we observed that well over 50% of EBs, upon prolonged culture, contained foci of beating cardiomyocytes, whereas no cardiomyocytes were present in the EBs that were formed in the absence of Dox (not shown). Similarly, the expression of cardiogenic genes within Flk-

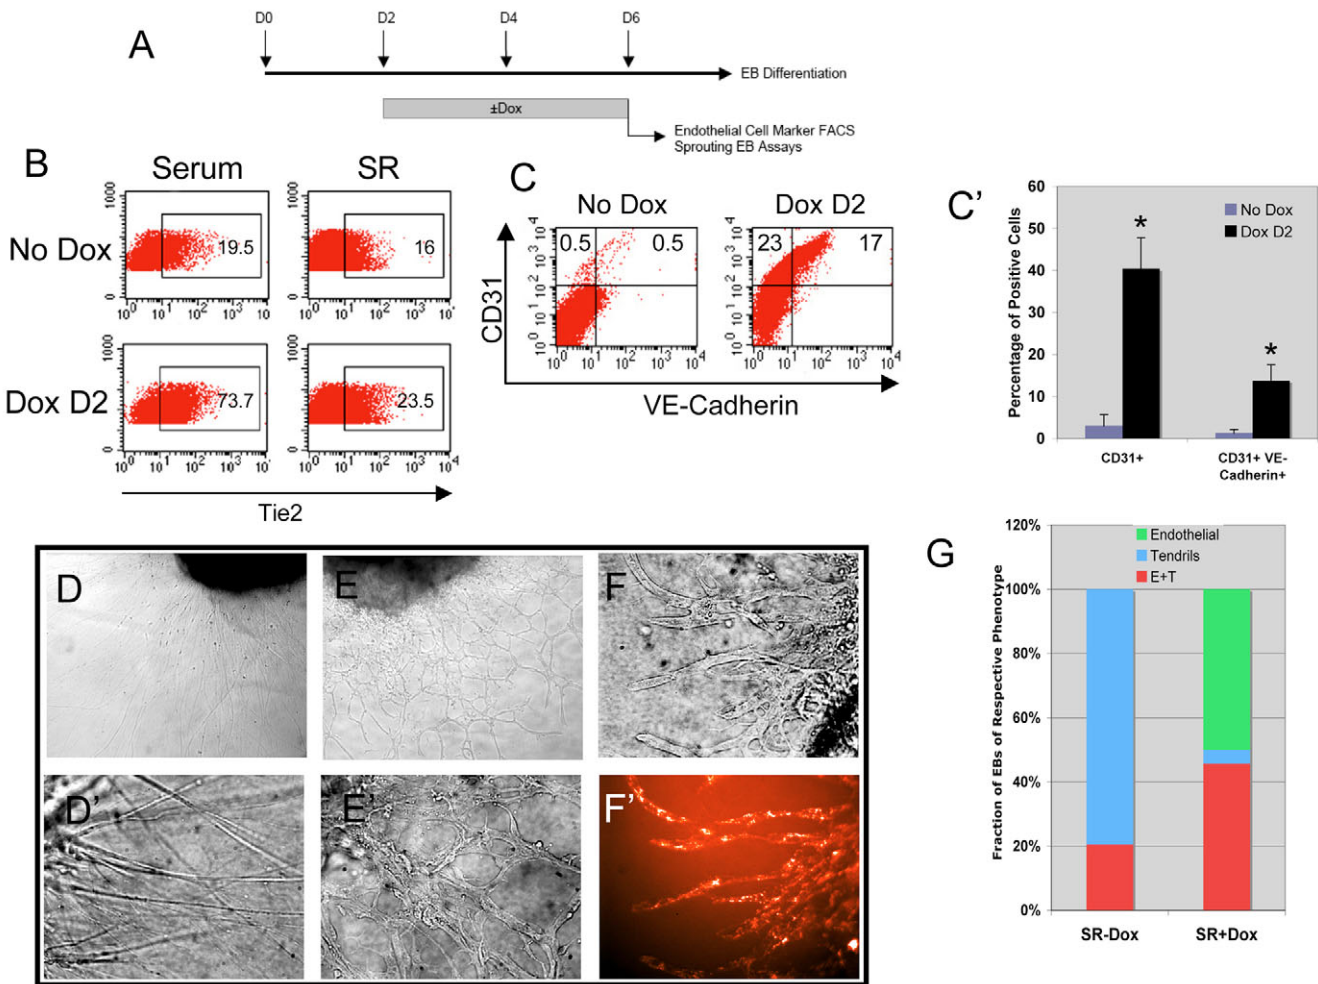

**Fig. 7. Augmented endothelial generation by GATA2.** (A) GATA2 induction scheme in differentiating EBs and formation of endothelial cells. Uppermost numbers indicate EB day. Gray bar indicates duration of Dox treatment and subsequent analyses of D6 EBs. (B) Generation of Tie2<sup>+</sup> endothelial cells by GATA2 expression in serum and SR conditions. Numbers in boxes indicate percentage of Tie2<sup>+</sup> cells. (C) Generation of CD31<sup>+</sup> and CD31<sup>+</sup>VE-Cadherin<sup>+</sup> endothelial cells in SR media. Numbers in upper left and right quadrants indicate percentage of CD31<sup>+</sup> and CD31<sup>+</sup>VE-Cadherin<sup>+</sup> cells, respectively. (C') Quantification of CD31<sup>+</sup> and CD31<sup>+</sup>VE-Cadherin<sup>+</sup> cells generated with or without Dox. Values are mean  $\pm$  s.e.m. from four independent experiments; \*,  $P < 0.001$  versus untreated. (D-E') Representative sprouting EB images. D and E show 100 $\times$  magnification of brightfield images of EBs generated in the absence (D) and presence (E) of Dox; D' and E' are 800 $\times$  magnifications of D and E, respectively, showing the tendril-like (D') and endothelial (E') cells generated in the two conditions. (F, F') Brightfield (F) and fluorescence (F') images of 800 $\times$  magnification of sprouting iGATA2 EBs demonstrating uptake of DiI-Ac-LDL by endothelial cells. (G) Fractional quantification of types of sprouting structures grown by 44 (-Dox) and 46 (+Dox) EBs grown in sprouting media.

1<sup>+</sup> cells has recently been reported (Wang et al., 2006). Whether the augmentation of cardiogenic genes in iGATA2 cells is the result of direct trans-activation carried out by GATA2, or is a response to BMP4 signaling, is unclear and needs to be examined in the future.

### GATA2 and Scl induction, hemangioblast specification and erythroid progenitors

The hemangioblast has long been considered to be transient. By enforcing GATA2 expression at different time points in differentiating ES cells, we demonstrate that the hemangioblast is indeed transient. Specifically, our Blast colony replating data demonstrated that if GATA2 is induced from day 2 and replated at D2.75 or D3, a decrease in Blast colony number is observed. This coincided with a precocious emergence of the hemangioblast's progeny, i.e. erythroid colonies or endothelial cells, at D2.75.

Consistently, when GATA2 was induced in situ upon Blast colony replating, there was a great increase in Blast colony formation. Intriguingly, our data show that under continued exogenous GATA2 expression, the Dox/Dox treatment scheme results in enhanced BL-CFC generation at early replating time points (D2.25, D2.5), but later replating (D2.75, D3) results in a similar number of BL-CFCs as in non-induced cells. We attribute this to the asynchronous differentiation of ES cells in the EB differentiation protocol. Specifically, BL-CFCs can be detected as early as D2.25, peak at D2.75, but are still present at D3 (blue bars in Fig. 5C). When GATA2 was induced from D2 and replated at D2.25, the BL-CFC generation was not affected (compare blue bar with yellow bar for D2.25 replating in Fig. 5C). Thus, the Dox/Dox scheme for D2.25 replating should generate similar effects as the No Dox/Dox scheme. When GATA2 was induced from D2 and cells replated at D2.75, the

BL-CFC number was greatly decreased. However, it should be noted that within D2.75 EBs, some cells are still en route to becoming BL-CFCs (compare blue bar and red bar at D3 replating in Fig. 5C). Thus, we should still detect an increase in Blast colony number in the Dox/Dox scheme as compared with Dox/No Dox treatment for later time point replating, i.e. D2.75 and D3. Based on our previous study which showed that Flk-1<sup>+</sup>Scl<sup>+</sup> cells are enriched for hemangioblasts (Chung et al., 2002), and on the current study which showed that GATA2 mediates *Scl* expression, we propose that GATA2 expression confers rapid differentiation of Flk-1<sup>+</sup> mesoderm through Flk-1<sup>+</sup>Scl<sup>+</sup> hemangioblasts into hematopoietic or endothelial cells by modulating *Scl*.

We have previously shown that BMP4 alone could generate a modest level of Scl<sup>+</sup> cells and that synergistic signaling by BMP4 and VEGF robustly generated Scl<sup>+</sup> cells (Park et al., 2004). Here, we have demonstrated that activation of GATA2 robustly yields Scl<sup>+</sup> cells. Importantly, activation of GATA2 did not augment *Vegf* expression, arguing that this effect was independent of VEGF signaling. Given the importance of *Scl* during development as well as in leukemogenesis, efforts have been invested into trying to elucidate the mechanism whereby *Scl* is regulated (Aplan et al., 1992; Bockamp et al., 1997; Gottgens et al., 1997; Gottgens et al., 2002; Gottgens et al., 2004). Here, we have shown in vivo occupancy of the *Scl* locus by GATA2 and then GATA1 in a system that recapitulates developing embryos. Only the conserved GATA site in the promoter region of *Scl* was occupied by GATA2 or GATA1 in developing EBs. In our ES/EB model, we did not see either GATA factor occupying the +19 enhancer site previously posited to confer hematopoietic specificity to *Scl* expression in leukemic cells (Gottgens et al., 2002; Gottgens et al., 2004). We argue that during embryogenesis, the +19 enhancer is not occupied, and whether the GATA occupancy of this enhancer is cell-type-dependent should be determined in the future. Our data demonstrate that *Scl* regulation by GATA2 and GATA1 during ES/EB development is distinctive, such that at the hemangioblast stage *Scl* is regulated by GATA2, whereas at the erythroid stage GATA1 displaces GATA2 to become the dominant GATA factor to sustain *Scl* expression. This dynamic occupancy mimics that seen at the *Gata2* locus during erythroid differentiation (Grass et al., 2003; Martowicz et al., 2005). Appreciation of such developmental control of *Scl* by different GATA factors should be crucial for further elucidating *Scl* regulation in hematopoietic development.

We have demonstrated that GATA2 can function independently within the primitive erythroid progenitor when induced from D3 and beyond. This induction of GATA2 within primitive erythroid progenitors increases the number of EryP cells and the size of EryP colonies. Through BrdU-uptake assays and examination of cell cycle genes we established that GATA2 confers a proliferative signal to EryP progenitor cells. The absence of *Gata2* during embryogenesis leads to embryonic lethality due to a unique anemia wherein all fetal hematopoietic organs develop properly yet are entirely barren of hematopoietic cells (Tsai et al., 1994). A subsequent study, examining the role that GATA2 plays in the proliferation of primitive hematopoietic cells, showed that a loss of the tumor suppressor *p53* was capable of partially rescuing the defect associated with *Gata2*<sup>-/-</sup> cells (Tsai and Orkin, 1997). Other studies of GATA2 have revealed that GATA2 may have discrete functions in different tissues. Intriguingly, during neural development, GATA2 has been shown to negatively regulate the cell cycle, allowing for neural differentiation at the expense of proliferation (El Wakil et al., 2006). Additionally, when GATA2 is induced at later stages of hematopoietic differentiation in the ES-EB system, it is capable of redirecting

macrophages into other hematopoietic cells (Kitajima et al., 2006). Collectively, GATA2 may have broader, cell-type-dependent roles in development and differentiation.

We thank Stuart Orkin (Children's Hospital, Boston) for the kind gift of the J1 and *Gata2*<sup>-/-</sup> ES cells; William Eades and Jacqueline Hughes of the Siteman Cancer Center High Speed Sorter Core Facility for performing cell-sorting; Jikun Zha for assistance with BrdU labeling analyses; and members of the K.C. lab for help with FACS analyses and critical discussions. The Siteman Cancer Center is supported in part by NCI Cancer Center Support Grant # P30 CA91842. This work was supported by grants from the National Institutes of Health, NHLBI, HL63736 and HL55337 to K.C., and by a predoctoral grant from the American Heart Association to J.J.L. J.J.L. is a fellow of the Lucille P. Markey Pathway in Human Pathobiology.

## References

- Aplan, P. D., Nakahara, K., Orkin, S. H. and Kirsch, I. R. (1992). The SCL gene product: a positive regulator of erythroid differentiation. *EMBO J.* **11**, 4073-4081.
- Bockamp, E. O., McLaughlin, F., Gottgens, B., Murrell, A. M., Elefanty, A. G. and Green, A. R. (1997). Distinct mechanisms direct SCL/tal-1 expression in erythroid cells and CD34 positive primitive myeloid cells. *J. Biol. Chem.* **272**, 8781-8790.
- Bresnick, E. H., Martowicz, M. L., Pal, S. and Johnson, K. D. (2005). Developmental control via GATA factor interplay at chromatin domains. *J. Cell. Physiol.* **205**, 1-9.
- Choi, K., Kennedy, M., Kazarov, A., Papadimitriou, J. C. and Keller, G. (1998). A common precursor for hematopoietic and endothelial cells. *Development* **125**, 725-732.
- Chung, Y. S., Zhang, W. J., Arentson, E., Kingsley, P. D., Palis, J. and Choi, K. (2002). Lineage analysis of the hemangioblast as defined by FLK1 and SCL expression. *Development* **129**, 5511-5520.
- Doherty, J. M., Carmichael, L. K. and Mills, J. C. (2006). GOURmet: a tool for quantitative comparison and visualization of gene expression profiles based on gene ontology (GO) distributions. *BMC Bioinformatics* **7**, 151.
- El Wakil, A., Francius, C., Wolff, A., Pleau-Varet, J. and Nardelli, J. (2006). The GATA2 transcription factor negatively regulates the proliferation of neuronal progenitors. *Development* **133**, 2155-2165.
- Ema, M., Faloon, P., Zhang, W. J., Hirashima, M., Reid, T., Stanford, W. L., Orkin, S., Choi, K. and Rossant, J. (2003). Combinatorial effects of Flk1 and Tal1 on vascular and hematopoietic development in the mouse. *Genes Dev.* **17**, 380-393.
- Faloon, P., Arentson, E., Kazarov, A., Deng, C. X., Porcher, C., Orkin, S. and Choi, K. (2000). Basic fibroblast growth factor positively regulates hematopoietic development. *Development* **127**, 1931-1941.
- Frazer, K. A., Pachter, L., Poliakov, A., Rubin, E. M. and Dubchak, I. (2004). VISTA: computational tools for comparative genomics. *Nucleic Acids Res.* **32**, W273-W279.
- Friedle, H. and Knochel, W. (2002). Cooperative interaction of Xvent-2 and GATA-2 in the activation of the ventral homeobox gene Xvent-1B. *J. Biol. Chem.* **277**, 23872-23881.
- Gottgens, B., McLaughlin, F., Bockamp, E. O., Fordham, J. L., Begley, C. G., Kosmopoulos, K., Elefanty, A. G. and Green, A. R. (1997). Transcription of the SCL gene in erythroid and CD34 positive primitive myeloid cells is controlled by a complex network of lineage-restricted chromatin-dependent and chromatin-independent regulatory elements. *Oncogene* **15**, 2419-2428.
- Gottgens, B., Nastos, A., Kinston, S., Piltz, S., Delabesse, E. C., Stanley, M., Sanchez, M. J., Cia-Uitz, A., Patient, R. and Green, A. R. (2002). Establishing the transcriptional programme for blood: the SCL stem cell enhancer is regulated by a multiprotein complex containing Ets and GATA factors. *EMBO J.* **21**, 3039-3050.
- Gottgens, B., Brocardo, C., Sanchez, M. J., Deveaux, S., Murphy, G., Gothert, J. R., Kotsopoulou, E., Kinston, S., Delaney, L., Piltz, S. et al. (2004). The scl +18/19 stem cell enhancer is not required for hematopoiesis: identification of a 5' bifunctional hematopoietic-endothelial enhancer bound by Flt-1 and Elf-1. *Mol. Cell. Biol.* **24**, 1870-1883.
- Grass, J. A., Boyer, M. E., Pal, S., Wu, J., Weiss, M. J. and Bresnick, E. H. (2003). GATA-1-dependent transcriptional repression of GATA-2 via disruption of positive autoregulation and domain-wide chromatin remodeling. *Proc. Natl. Acad. Sci. USA* **100**, 8811-8816.
- Huber, T. L., Kouskoff, V., Fehling, H. J., Palis, J. and Keller, G. (2004). Haemangioblast commitment is initiated in the primitive streak of the mouse embryo. *Nature* **432**, 625-630.
- Iida, M., Heike, T., Yoshimoto, M., Baba, S., Doi, H. and Nakahata, T. (2005). Identification of cardiac stem cells with FLK1, CD31, and VE-cadherin expression during embryonic stem cell differentiation. *FASEB J.* **19**, 371-378.
- Im, H., Grass, J. A., Johnson, K. D., Boyer, M. E., Wu, J. and Bresnick, E. H.

- (2004). Measurement of protein-DNA interactions in vivo by chromatin immunoprecipitation. *Methods Mol. Biol.* **284**, 129-146.
- Im, H., Grass, J. A., Johnson, K. D., Kim, S. I., Boyer, M. E., Imbalzano, A. N., Bieker, J. J. and Bresnick, E. H.** (2005). Chromatin domain activation via GATA-1 utilization of a small subset of dispersed GATA motifs within a broad chromosomal region. *Proc. Natl. Acad. Sci. USA* **102**, 17065-17070.
- Ivanova, N. B., Dimos, J. T., Schaniel, C., Hackney, J. A., Moore, K. A. and Lemischka, I. R.** (2002). A stem cell molecular signature. *Science* **298**, 601-604.
- Kitajima, K., Tanaka, M., Zheng, J., Yen, H., Sato, A., Sugiyama, D., Umehara, H., Sakai, E. and Nakano, T.** (2006). Redirecting differentiation of hematopoietic progenitors by a transcription factor, GATA-2. *Blood* **107**, 1857-1863.
- Kouskoff, V., Lacaud, G., Schwantz, S., Fehling, H. J. and Keller, G.** (2005). Sequential development of hematopoietic and cardiac mesoderm during embryonic stem cell differentiation. *Proc. Natl. Acad. Sci. USA* **102**, 13170-13175.
- Kyba, M., Perlingeiro, R. C. and Daley, G. Q.** (2002). HoxB4 confers definitive lymphoid-myeloid engraftment potential on embryonic stem cell and yolk sac hematopoietic progenitors. *Cell* **109**, 29-37.
- Larsson, J. and Karlsson, S.** (2005). The role of Smad signaling in hematopoiesis. *Oncogene* **24**, 5676-5692.
- Li, C. and Wong, W. H.** (2001). Model-based analysis of oligonucleotide arrays: expression index computation and outlier detection. *Proc. Natl. Acad. Sci. USA* **98**, 31-36.
- Loots, G. G., Ovcharenko, I., Pachter, L., Dubchak, I. and Rubin, E. M.** (2002). rVista for comparative sequence-based discovery of functional transcription factor binding sites. *Genome Res.* **12**, 832-839.
- Maeno, M., Mead, P. E., Kelley, C., Xu, R. H., Kung, H. F., Suzuki, A., Ueno, N. and Zon, L. I.** (1996). The role of BMP-4 and GATA-2 in the induction and differentiation of hematopoietic mesoderm in *Xenopus laevis*. *Blood* **88**, 1965-1972.
- Martowicz, M. L., Grass, J. A., Boyer, M. E., Guend, H. and Bresnick, E. H.** (2005). Dynamic GATA factor interplay at a multicomponent regulatory region of the GATA-2 locus. *J. Biol. Chem.* **280**, 1724-1732.
- Mills, J. C., Andersson, N., Hong, C. V., Stappenbeck, T. S. and Gordon, J. I.** (2002). Molecular characterization of mouse gastric epithelial progenitor cells. *Proc. Natl. Acad. Sci. USA* **99**, 14819-14824.
- Mills, J. C., Andersson, N., Stappenbeck, T. S., Chen, C. C. and Gordon, J. I.** (2003). Molecular characterization of mouse gastric zymogenic cells. *J. Biol. Chem.* **278**, 46138-46145.
- Minko, K., Bollerot, K., Drevon, C., Hallais, M. F. and Jaffredo, T.** (2003). From mesoderm to blood islands: patterns of key molecules during yolk sac erythropoiesis. *Gene Expr. Patterns* **3**, 261-272.
- Miyazono, K., Maeda, S. and Imamura, T.** (2005). BMP receptor signaling: transcriptional targets, regulation of signals, and signaling cross-talk. *Cytokine Growth Factor Rev.* **16**, 251-263.
- Moser, M. and Patterson, C.** (2005). Bone morphogenetic proteins and vascular differentiation: BMPing up vasculogenesis. *Thromb. Haemost.* **94**, 713-718.
- Nemer, G. and Nemer, M.** (2003). Transcriptional activation of BMP-4 and regulation of mammalian organogenesis by GATA-4 and -6. *Dev. Biol.* **254**, 131-148.
- Nicosia, R. F. and Ottinetti, A.** (1990a). Growth of microvessels in serum-free matrix culture of rat aorta. A quantitative assay of angiogenesis in vitro. *Lab. Invest.* **63**, 115-122.
- Nicosia, R. F. and Ottinetti, A.** (1990b). Modulation of microvascular growth and morphogenesis by reconstituted basement membrane gel in three-dimensional cultures of rat aorta: a comparative study of angiogenesis in matrigel, collagen, fibrin, and plasma clot. *In Vitro Cell. Dev. Biol.* **26**, 119-128.
- Nishikawa, S. I., Nishikawa, S., Hirashima, M., Matsuyoshi, N. and Kodama, H.** (1998). Progressive lineage analysis by cell sorting and culture identifies FLK1+VE-cadherin+ cells at a diverging point of endothelial and hemopoietic lineages. *Development* **125**, 1747-1757.
- Oren, T., Torregroza, I. and Evans, T.** (2005). An Oct-1 binding site mediates activation of the gata2 promoter by BMP signaling. *Nucleic Acids Res.* **33**, 4357-4367.
- Pan, X., Ohneda, O., Ohneda, K., Lindeboom, F., Iwata, F., Shimizu, R., Nagano, M., Suwabe, N., Philipsen, S., Lim, K. C. et al.** (2005). Graded levels of GATA-1 expression modulate survival, proliferation, and differentiation of erythroid progenitors. *J. Biol. Chem.* **280**, 22385-22394.
- Park, C., Afrikanova, I., Chung, Y. S., Zhang, W. J., Arentson, E., Fong, G. H., G., Rosendahl, A. and Choi, K.** (2004). A hierarchical order of factors in the generation of FLK1- and SCL-expressing hematopoietic and endothelial progenitors from embryonic stem cells. *Development* **131**, 2749-2762.
- Park, C., Lugus, J. J. and Choi, K.** (2005). Stepwise commitment from embryonic stem to hematopoietic and endothelial cells. *Curr. Top. Dev. Biol.* **66**, 1-36.
- Phillips, R. L., Ernst, R. E., Brunk, B., Ivanova, N., Mahan, M. A., Deanehan, J. K., Moore, K. A., Overton, G. C. and Lemischka, I. R.** (2000). The genetic program of hematopoietic stem cells. *Science* **288**, 1635-1640.
- Ramalho-Santos, M., Yoon, S., Matsuzaki, Y., Mulligan, R. C. and Melton, D. A.** (2002). 'Stemness': transcriptional profiling of embryonic and adult stem cells. *Science* **298**, 597-600.
- Rojas, A., De Val, S., Heidt, A. B., Xu, S. M., Bristow, J. and Black, B. L.** (2005). Gata4 expression in lateral mesoderm is downstream of BMP4 and is activated directly by Forkhead and GATA transcription factors through a distal enhancer element. *Development* **132**, 3405-3417.
- Rylski, M., Welch, J. J., Chen, Y. Y., Letting, D. L., Diehl, J. A., Chodosh, L. A., Blobel, G. A. and Weiss, M. J.** (2003). GATA-1-mediated proliferation arrest during erythroid maturation. *Mol. Cell. Biol.* **23**, 5031-5042.
- Tsai, F. Y. and Orkin, S. H.** (1997). Transcription factor GATA-2 is required for proliferation/survival of early hematopoietic cells and mast cell formation, but not for erythroid and myeloid terminal differentiation. *Blood* **89**, 3636-3643.
- Tsai, F. Y., Keller, G., Kuo, F. C., Weiss, M., Chen, J., Rosenblatt, M., Alt, F. W. and Orkin, S. H.** (1994). An early haematopoietic defect in mice lacking the transcription factor GATA-2. *Nature* **371**, 221-226.
- Voyta, J. C., Via, D. P., Butterfield, C. E. and Zetter, B. R.** (1984). Identification and isolation of endothelial cells based on their increased uptake of acetylated-low density lipoprotein. *J. Cell Biol.* **99**, 2034-2040.
- Wang, H., Charles, P. C., Wu, Y., Ren, R., Pi, X., Moser, M., Barshishat-Kupper, M., Rubin, J. S., Perou, C., Bautch, V. et al.** (2006). Gene expression profile signatures indicate a role for Wnt signaling in endothelial commitment from embryonic stem cells. *Circ. Res.* **10**, 1331-1339.
- Wang, H. S., Hwang, L. L., Sue, H. F., Lee, K. M. and Chen, C. T.** (2004). A simple quantitative method for evaluation of angiogenesis activity. *Assay Drug Dev. Technol.* **2**, 31-38.
- Winnier, G., Blessing, M., Labosky, P. A. and Hogan, B. L.** (1995). Bone morphogenetic protein-4 is required for mesoderm formation and patterning in the mouse. *Genes Dev.* **9**, 2105-2116.
- Yu, C., Cantor, A. B., Yang, H., Browne, C., Wells, R. A., Fujiwara, Y. and Orkin, S. H.** (2002). Targeted deletion of a high-affinity GATA-binding site in the GATA-1 promoter leads to selective loss of the eosinophil lineage in vivo. *J. Exp. Med.* **195**, 1387-1395.
- Zhong, S., Li, C. and Wong, W. H.** (2003). ChipInfo: software for extracting gene annotation and gene ontology information for microarray analysis. *Nucleic Acids Res.* **31**, 3483-3486.
